# Supplementary material for: Costs of childhood vaccine delivery in Iraq: a cross-sectional study
Source: HighWire-hosted journal article supplement (doi:10.1136/bmjopen-2021-059566), 2022-09-01
Supplement: bmjopen-2021-059566supp001_data_supplement.pdf [file bmjopen-2021-059566supp001_data_supplement.pdf]

## Costs of childhood vaccine delivery in Iraq – Supplementary Materials

*Cristina Garcia*<sup>1</sup>, *SM Moazzem Hossain*<sup>2</sup>, *Faris Lam*<sup>3</sup>, *Firas Jabbar*<sup>4</sup>, *Alaa Rahi*<sup>5</sup>, *Kamal Abdul Razaq*<sup>4</sup>, *Sara Al-Dahir*<sup>6</sup>, *Ulla K Griffiths*<sup>2</sup>

<sup>1</sup>International Vaccine Access Center, Department of International Health, Johns Hopkins Bloomberg School of Public Health, Baltimore, USA

<sup>2</sup> Sr. Health Advisor, UNICEF NYHQ, 3 UN Plaza, New York, NY 10017, USA

<sup>3</sup>Professor, College of Medicine, Baghdad, Iraq

<sup>4</sup>Program Managers, EPI Department, MOH, Iraq

<sup>5</sup>Immunization Specialist, UNICEF Iraq, Baghdad

<sup>6</sup>Professor, Xavier University, USA

|                                                                            |                |
|----------------------------------------------------------------------------|----------------|
| <b>Appendix 1: Health facility sampling strategy</b>                       | <b>Page 2</b>  |
| <b>Appendix 2: Methods used for estimating capital and recurrent costs</b> | <b>Page 5</b>  |
| <b>Appendix 3: Vaccine delivery cost at each level by line item</b>        | <b>Page 12</b> |

## Appendix 1. Health facility sampling strategy

To capture regional differences, health facilities providing immunization services were stratified into three sub-national regions: Central and South, North/Kurdistan Region of Iraq (KRI), and Retaken Areas. A sampling frame of all 1719 primary healthcare (PHC) centers and sub-centers was obtained from the Ministry of Health. The number of districts per region and the number of health facilities per district participating in the national immunization program are described in Table 1.

**Table A1. Number of health facilities by region and district in Iraq (2018)**

| Regions         | Districts  | PHC Centers<br>(Mean per District) | PHC Sub-Centers<br>(Mean per District) | Total PHCs Facilities<br>(Mean per District) |
|-----------------|------------|------------------------------------|----------------------------------------|----------------------------------------------|
| Central & South | 71         | 696 (9.8)                          | 353 (6.1)                              | <b>1049 (14.8)</b>                           |
| North/KRI       | 28         | 253 (9.0)                          | 73 (3.5)                               | <b>326 (11.6)</b>                            |
| Retaken Areas   | 33         | 220 (6.9)                          | 124 (4.8)                              | <b>344 (10.4)</b>                            |
| <b>Total</b>    | <b>132</b> | <b>1,169 (8.9)</b>                 | <b>550 (4.2)</b>                       | <b>1,719 (13.0)</b>                          |

Health facilities were sampled using the Sample Design Optimizer (SDO) tool following a multistage probabilistic sampling approach stratified by sub-national region<sup>1</sup>. To evaluate the precision of the sample, published estimates of the cost of vaccine delivery in Honduras were used as a proxy for costs in Iraq (Table 2)<sup>2</sup>. Costs from Honduras were converted to 2018 Iraqi dinar and are presented in 2018 US\$ using an exchange rate of 1189.24 IQD = 1 USD.

**Table A2. Delivery cost estimates used in the proxy outcome estimate for sampling**

| Distribution Level                            | Estimated Cost per Dose<br>(2018 US\$) | No. of Health Facilities |
|-----------------------------------------------|----------------------------------------|--------------------------|
| Health Facilities (no. of doses) <sup>1</sup> |                                        |                          |
| Huge ( $\geq 10,000$ )                        | \$2.08                                 | 657                      |
| Large (5000 – 9999)                           | \$3.38                                 | 383                      |
| Medium (1500 – 4999)                          | \$3.69                                 | 521                      |
| Small (500 – 1499)                            | \$6.78                                 | 127                      |
| Tiny (< 500)                                  | \$18.67                                | 32                       |
| District Level                                | \$8.28 <sup>2</sup>                    | 132                      |
| Directorate Level                             | \$5.2 <sup>2</sup>                     | 19                       |

<sup>1</sup>Size was estimated using the population under-one and the number of doses per fully vaccinated child

<sup>2</sup>Cost per fully vaccinated child

A total of 97 facilities (73 PHC Centers and 24 PHC Sub Centers) were randomly sampled, and distribution stores at the district and directorate level serving the sampled facilities were also included to capture management, cold chain storage and distribution costs at higher levels. The complete list of the sampled PHC Centers and Sub-Centers are described in Table 3.

<sup>1</sup>EPIC Project and ProVac Initiative. Sample Design Optimizer (SDO) Instrument: User Guide. Harvard T.H. Chan School of Public Health; 2019. Available at: <http://immunizationeconomics.org/sample-design-optimizer>.

<sup>2</sup>Janusz CB, Castañeda-Orjuela C, Molina Aguilera IB, Felix Garcia AG, Mendoza L, Díaz IY, et al. Examining the cost of delivering routine immunization in Honduras. *Vaccine*. 2015;33 Suppl 1:A53-9.

**Table A3. Sampled Primary Health Care Centers and Sub-Centers**

| Region          | Directorate  | District     | Facility             | Estimated Population Under-One | Estimated Doses Delivered |
|-----------------|--------------|--------------|----------------------|--------------------------------|---------------------------|
| Central & South | BaghdadKarkh | AlDoura      | AlJebeihJi           | 518                            | 6337                      |
| Central & South | BaghdadKarkh | AlDoura      | BalatAlShouhadaa     | 1964                           | 24026                     |
| Central & South | BaghdadKarkh | AlDoura      | HaiAlSehhaAlRaeissi  | 764                            | 9346                      |
| Central & South | BaghdadKarkh | AlDoura      | MustafaAlSadr        | 1270                           | 15536                     |
| Central & South | BaghdadKarkh | AlMahmoudieh | AlRasheed            | 697                            | 7380                      |
| Central & South | BaghdadKarkh | AlMahmoudieh | AlRasheedAlNamothaji | 876                            | 9275                      |
| Central & South | BaghdadKarkh | AlMahmoudieh | AlZunbranieh         | 180                            | 1906                      |
| Central & South | BaghdadKarkh | AlMahmoudieh | TalAlSamar           | 118                            | 1249                      |
| Central & South | Dewanieh     | AlDewanieh   | AlAmel               | 271                            | 3090                      |
| Central & South | Dewanieh     | AlDewanieh   | AlDaghara            | 1944                           | 22167                     |
| Central & South | Dewanieh     | AlDewanieh   | HaiAlHakeem          | 525                            | 5986                      |
| Central & South | Dewanieh     | AlDewanieh   | HaiAlTaqeya          | 627                            | 7149                      |
| Central & South | Dewanieh     | AlHamzah     | AlHamzaAlAwal        | 1029                           | 12577                     |
| Central & South | Dewanieh     | AlHamzah     | AlShanafeiyaAlAwal   | 901                            | 11012                     |
| Central & South | Dewanieh     | AlHamzah     | AlShanafeiyaAlThani  | 810                            | 9900                      |
| Central & South | Dewanieh     | AlHamzah     | AlZahraa             | 271                            | 3312                      |
| Central & South | Diyala       | Baladrooz    | AlFatemeya           | 144                            | 1674                      |
| Central & South | Diyala       | Baladrooz    | AlShaheedMurtada     | 1044                           | 12135                     |
| Central & South | Diyala       | Baladrooz    | BeldozaAlAwal        | 1320                           | 15343                     |
| Central & South | Diyala       | Baladrooz    | Mandali              | 912                            | 10600                     |
| Central & South | Diyala       | Khangeen     | AlSaadeya            | 168                            | 1897                      |
| Central & South | Diyala       | Khangeen     | Jabara               | 472                            | 5329                      |
| Central & South | Diyala       | Khangeen     | QurraTuba            | 1260                           | 14225                     |
| Central & South | Diyala       | Khangeen     | ShaikhBaba           | 500                            | 5645                      |
| Central & South | Karbulaa     | Alhor        | AlHassanAlAskari     | 2369                           | 25042                     |
| Central & South | Karbulaa     | Alhor        | AlYarmouk            | 1498                           | 15835                     |
| Central & South | Karbulaa     | Alhor        | HaiAlAmeer           | 436                            | 4609                      |
| Central & South | Karbulaa     | Alhor        | HaiAlAmmel           | 793                            | 8383                      |
| Central & South | Karbulaa     | Almarkaz     | AinAlTamer           | 936                            | 9297                      |
| Central & South | Karbulaa     | Almarkaz     | AlNasr               | 1200                           | 11919                     |
| Central & South | Karbulaa     | Almarkaz     | HaiAlAbbas           | 1488                           | 14779                     |
| Central & South | Karbulaa     | Almarkaz     | HaiAlHadi            | 540                            | 5363                      |
| Central & South | Mouthanna    | Alkhodar     | AlDaraji             | 540                            | 5591                      |
| Central & South | Mouthanna    | Alkhodar     | AlKhader             | 1272                           | 13170                     |
| Central & South | Mouthanna    | Alkhodar     | AlSadeq              | 984                            | 10188                     |
| Central & South | Mouthanna    | Alkhodar     | AlThaherah           | 228                            | 2361                      |
| Central & South | Mouthanna    | Samawa       | AlHaidariyeh         | 1349                           | 13964                     |
| Central & South | Mouthanna    | Samawa       | AlHussein            | 536                            | 5549                      |
| Central & South | Mouthanna    | Samawa       | AlSharqi             | 375                            | 3882                      |
| Central & South | Mouthanna    | Samawa       | GharbiAlSamawa       | 1465                           | 15165                     |
| Central & South | Najaf        | Almeshkhab   | AlBarra              | 271                            | 2728                      |

| Region          | Directorate | District     | Facility             | Estimated Population Under-One | Estimated Doses Delivered |
|-----------------|-------------|--------------|----------------------|--------------------------------|---------------------------|
| Central & South | Najaf       | Almeshkhab   | AlMeshkhab           | 2964                           | 29842                     |
| Central & South | Najaf       | Almeshkhab   | AlQadeseiya          | 1560                           | 15706                     |
| Central & South | Najaf       | Almeshkhab   | SouqShalan           | 552                            | 5558                      |
| Central & South | Najaf       | Almonatharah | AlHaira              | 747                            | 7197                      |
| Central & South | Najaf       | Almonatharah | AlManathera          | 1300                           | 12525                     |
| Central & South | Najaf       | Almonatharah | AlMarashdeh          | 408                            | 3931                      |
| Central & South | Najaf       | Almonatharah | MahajeerAlGharbeya   | 184                            | 1773                      |
| Central & South | Thiqar      | Alshatrah    | AlFattaheya          | 1392                           | 15548                     |
| Central & South | Thiqar      | Alshatrah    | AlKhalsa             | 1200                           | 13403                     |
| Central & South | Thiqar      | Alshatrah    | AlMaen               | 96                             | 1072                      |
| Central & South | Thiqar      | Alshatrah    | AlQudsAlSehhi        | 750                            | 8377                      |
| Central & South | Thiqar      | Nasriah      | AlBathaa             | 520                            | 5625                      |
| Central & South | Thiqar      | Nasriah      | AlmamAlHassan        | 709                            | 7669                      |
| Central & South | Thiqar      | Nasriah      | AlRazi               | 1130                           | 12223                     |
| Central & South | Thiqar      | Nasriah      | AlSadda              | 240                            | 2596                      |
| Central & South | Wasset      | Alazeziah    | AlAzezeiah           | 2902                           | 35183                     |
| Central & South | Wasset      | Alazeziah    | AlNour               | 765                            | 9275                      |
| Central & South | Wasset      | Alazeziah    | SharhanAlGharbi      | 234                            | 2837                      |
| Central & South | Wasset      | Alazeziah    | TajEldeen            | 1092                           | 13239                     |
| Central & South | Wasset      | Alnomaniah   | AlAhrar              | 1074                           | 12338                     |
| Central & South | Wasset      | Alnomaniah   | AlNouman             | 360                            | 4136                      |
| Central & South | Wasset      | Alnomaniah   | AlNoumaneyyah        | 2208                           | 25364                     |
| Central & South | Wasset      | Alnomaniah   | AlSadreen            | 2304                           | 26467                     |
| North/KRI       | Erbil       | Barazan      | Barzan               | 120                            | 1343                      |
| North/KRI       | Erbil       | Barazan      | Bazy                 | 60                             | 671                       |
| North/KRI       | Erbil       | Barazan      | Biran                | 132                            | 1477                      |
| North/KRI       | Erbil       | Barazan      | Sardawe              | 72                             | 806                       |
| North/KRI       | Erbil       | Shaglawah    | Hiran                | 105                            | 1134                      |
| North/KRI       | Erbil       | Shaglawah    | Safeen               | 76                             | 821                       |
| North/KRI       | Erbil       | Shaglawah    | ShaheedMlazmKarim    | 630                            | 6804                      |
| North/KRI       | Erbil       | Shaglawah    | Sisawe               | 30                             | 324                       |
| North/KRI       | Sulaimanieh | Halabja      | Byara                | 99                             | 1156                      |
| North/KRI       | Sulaimanieh | Halabja      | HalabjayShahid       | 1679                           | 19613                     |
| North/KRI       | Sulaimanieh | Halabja      | ShahidAliSheea       | 1675                           | 19567                     |
| North/KRI       | Sulaimanieh | Halabja      | ShahidAmjadHajiGhali | 1500                           | 17522                     |
| North/KRI       | Sulaimanieh | Raniah       | Khdran               | 132                            | 1495                      |
| North/KRI       | Sulaimanieh | Raniah       | RapariniRanya        | 12                             | 136                       |
| North/KRI       | Sulaimanieh | Raniah       | Shkarta              | 960                            | 10874                     |
| Retaken Areas   | Anbar       | AlKhaldiah   | AlboHusseinAlAli     | 200                            | 2533                      |
| Retaken Areas   | Anbar       | AlKhaldiah   | AlKhaldeya           | 640                            | 8104                      |
| Retaken Areas   | Anbar       | AlKhaldiah   | AlMadeeq             | 540                            | 6838                      |
| Retaken Areas   | Anbar       | AlKhaldiah   | AlShouhada           | 480                            | 6078                      |
| Retaken Areas   | Anbar       | Heet         | AlFurat              | 895                            | 11442                     |

| Region        | Directorate | District       | Facility             | Estimated Population Under-One | Estimated Doses Delivered |
|---------------|-------------|----------------|----------------------|--------------------------------|---------------------------|
| Retaken Areas | Anbar       | Heet           | AlMoalemeen          | 298                            | 3810                      |
| Retaken Areas | Anbar       | Heet           | AlMuhamdi            | 273                            | 3490                      |
| Retaken Areas | Anbar       | Heet           | Kbessah              | 493                            | 6303                      |
| Retaken Areas | Karkouk     | Aldebes        | Khalkhlan            | 204                            | 2431                      |
| Retaken Areas | Karkouk     | Aldebes        | Malha                | 110                            | 1311                      |
| Retaken Areas | Karkouk     | Aldebes        | Sarkran              | 47                             | 560                       |
| Retaken Areas | Karkouk     | Aldebes        | Yayji                | 353                            | 4206                      |
| Retaken Areas | Karkouk     | AlHoweigaThani | AlShaheedHamadJassem | 704                            | 6019                      |
| Retaken Areas | Ninawa      | AlAysar        | alkhdraa             | 600                            | 6300                      |
| Retaken Areas | Ninawa      | AlAysar        | alnoor               | 2580                           | 27089                     |
| Retaken Areas | Ninawa      | AlAysar        | alqudes              | 648                            | 6804                      |
| Retaken Areas | Ninawa      | AlAysar        | alwahda              | 1200                           | 12600                     |
| Retaken Areas | Ninawa      | Senjar         | snone                | 5000                           | 48252                     |

## Appendix 2. Methods used for estimating capital and recurrent costs

This section describes the approach used to calculate the cost of vaccine delivery. All costs were collected in Iraqi Dinar (IQD) and converted to USD using an exchange rate of 1189.24 IQD = 1 USD. A bottom-up approach was used when possible to estimate the cost per line item category and immunization activity type. Shared resources, including those shared between the routine immunization program and other health services and across routine immunization activities, were allocated using tracing factors described in Table 4.

**Table A4. Tracing factors used to allocate of shared resources**

| Line Item                        | Type of Shared Cost                                                                                                                                                                            | Total to Immunization portion                                      | Immunization portion to activity type                                     |
|----------------------------------|------------------------------------------------------------------------------------------------------------------------------------------------------------------------------------------------|--------------------------------------------------------------------|---------------------------------------------------------------------------|
| Personnel salaries               | Allocation of time to routine immunization and then activity type                                                                                                                              | % of time spent on immunization services                           | % of time spent on the activity type                                      |
| Vehicles and vehicle maintenance | <ul style="list-style-type: none"> <li>Vehicles at the facility level for outreach and vaccine collection</li> <li>Vehicles at higher levels for program management and supervision</li> </ul> | % used for routine immunizations as reported by the facility       | Ratio derived from the number of total km traveled for each activity type |
| Vehicle fuel and maintenance     | Allocated directly to the activity type                                                                                                                                                        | 100% to routine immunization (assumed no trips were multi-purpose) | 100% to the best fit activity                                             |

| Line Item                                | Type of Shared Cost                                                       | Total to Immunization portion                                                                             | Immunization portion to activity type                                                                                                                                                |
|------------------------------------------|---------------------------------------------------------------------------|-----------------------------------------------------------------------------------------------------------|--------------------------------------------------------------------------------------------------------------------------------------------------------------------------------------|
| Cold Chain Equipment                     | Small cold boxes and vaccine carriers for outreach                        | % used for routine immunization as reported by the facility                                               | % of time spent on outreach activities                                                                                                                                               |
| Office equipment, printing, and supplies | Office equipment, printing, and supplies used for a variety of activities | % used for routine immunization as reported by the facility                                               | 100% allocated to program management                                                                                                                                                 |
| Building overhead                        | Building value, maintenance, and utilities                                | % facility space allocated to routine immunization (based on square meters used for routine immunization) | <ul style="list-style-type: none"> <li>For health facilities, 100% allocated to facility-based delivery.</li> <li>For higher levels, 100% allocated to program management</li> </ul> |
| Wastage disposal                         | Incinerator or wastage removal service                                    | % used for routine immunization                                                                           | 100% allocated to facility-based delivery                                                                                                                                            |

### Estimation of capital costs

The following approach and assumptions were used to estimate the capital cost of line items for cold chain and office equipment, vehicles and buildings. All capital costs were annualized using equation 1:

$$AF = \frac{(1+r)^{(n-1)}}{r(1+r)^n} \quad (1)$$

where  $AF$  is the annualization factor,  $r$  is the discount rate (3% used in this study) and  $n$  is the useful life-years of the equipment. The annualized cost of equipment was estimated using the equation 2 where  $N$  is the number of units,  $P$  is the proportion used for routine immunization, and  $R$  is the replace price for equipment type  $i$ . To estimate the cost of each activity, the  $C_E$  was multiplied by the percentage used for each activity using the tracing factors described above. Standardized prices and assumptions used for estimating the capital equipment line item and activity cost are described in Tables 5-8.

$$C_E = \sum_i \frac{N_i \times P_i \times R_i}{AF_i} \quad (2)$$

**Table A5. Assumptions used in estimating cost of capital equipment**

| Line Item  | Variables                      | Assumptions                                                                                                                                                       |
|------------|--------------------------------|-------------------------------------------------------------------------------------------------------------------------------------------------------------------|
| Cold Chain | Equipment price                | Replacement prices for cold chain equipment were obtained from UNICEF and the MOH EPI (See Table 6).                                                              |
|            | Useful life years              | Recommended life years from UNICEF procurement lists                                                                                                              |
|            | % used for specific activities | 100% of cold chain equipment allocated to facility-based vaccine delivery at the facility-level and allocated to vaccine collection and storage at higher levels. |
| Vehicles   | Vehicle Price                  | Replacement prices for different vehicle types were obtained from the MOH EPI (See Table 7).                                                                      |

| Line Item        | Variables                       | Assumptions                                                                                                                                                                                                                                                  |
|------------------|---------------------------------|--------------------------------------------------------------------------------------------------------------------------------------------------------------------------------------------------------------------------------------------------------------|
|                  | Useful life years               | 15 years was used for all vehicles per recommendation from the MOH EPI and country team                                                                                                                                                                      |
|                  | % used for routine immunization | The % reported by the facilities. When information was missing, the region- and level-specific average was used (See Table 8). At the central level, all vehicles were used 80% of the time for routine immunization.                                        |
|                  | % used for specific activities  | The region and level average % kilometers traveled for each activity was used to estimate the % of vehicles allocated for each activity (See Table 8).                                                                                                       |
| Office Equipment | Equipment price                 | To account for variability in furniture types at each facility, replacement prices from the facility survey were used. When prices were missing, multiple imputation adjusting for region, facility type, and furniture type was used to estimate the price. |
|                  | Useful life years               | The life years from the facility survey, ranging from 3 years for electronic equipment to 10 years for furniture.                                                                                                                                            |
|                  | % used for routine immunization | The % reported by the facility.                                                                                                                                                                                                                              |
|                  | % used for specific activities  | 100% of office equipment allocated to program management.                                                                                                                                                                                                    |

**Table A6. Prices, energy consumption, and useful life years used in calculation of cold chain equipment**

| Equipment Type                  | Replacement Price (US\$) | kWh per Day | Useful Life Years* |
|---------------------------------|--------------------------|-------------|--------------------|
| Cold Box less than 10 liter     | 70                       | 0           | 10                 |
| Cold Box less than 20 liter     | 115                      | 0           | 10                 |
| Cold Box more than 20 liter     | 115                      | 0           | 10                 |
| Cold Room or Freezer room 10 M3 | 15,700                   | 1.3         | 25                 |
| Cold Room or Freezer room 20 M3 | 21,160                   | 1.75        | 25                 |
| Cold Room or Freezer room 40 M3 | 27,954                   | 2.61        | 25                 |
| Freezer room                    | 27,954                   | 2.61        | 25                 |
| MF 114 Freezer                  | 473                      | 2.24        | 15                 |
| MF 214 Freezer                  | 550                      | 3           | 15                 |
| MF 314 Freezer                  | 642                      | 4.23        | 15                 |
| MK204 Freezer                   | 896                      | 1.89        | 15                 |
| MK304 Freezer                   | 1,036                    | 3.2         | 15                 |
| TCW 1152/CF Freezer             | 900                      | 2.912       | 15                 |
| Generic Freezer                 | 250                      | 2.912       | 15                 |
| MF 114 Refrigerator             | 473                      | 2.24        | 15                 |
| MF 144 Refrigerator             | 840                      | 2.3         | 15                 |
| MK204 Refrigerator              | 896                      | 1.89        | 15                 |

| Equipment Type                           | Replacement Price (US\$) | kWh per Day | Useful Life Years* |
|------------------------------------------|--------------------------|-------------|--------------------|
| MK304 Refrigerator                       | 1,036                    | 3.2         | 15                 |
| VLS 400 Greenline Refrigerator           | 1,296                    | 0.67        | 15                 |
| Generic Refrigerator                     | 250                      | 2.015       | 15                 |
| Fridge tag thermometer                   | 29                       | 0           | 3                  |
| Generic thermometer                      | 6                        | 0           | 3                  |
| Ice Packs                                | 0.28                     | 0           | 5                  |
| Vaccine carrier less than 2 liter        | 12                       | 0           | 10                 |
| Vaccine carrier more or equal to 2 liter | 16                       | 0           | 10                 |
| Voltage regulator                        | 55                       | 0           | 5                  |

\*Useful life years standardized based on the median value reported in the facility surveys. Cold room life years was based on feedback from the Iraq EPI

**Table A7. Prices used for vehicles by type and make/model**

| Vehicle Type       | Make/Model                                        | Replacement Price (US\$) |
|--------------------|---------------------------------------------------|--------------------------|
| Ambulance          | GMC, Mercedes                                     | 30,000                   |
| Ambulance          | Toyota, Land Cruise, Generic                      | 20,000                   |
| Refrigerated Truck | Hyundai, Renault, Iveco                           | 30,000                   |
| Refrigerated Truck | Mercedes                                          | 40,000                   |
| Micro-/Mini-bus    | Nissan, Mazda, Generic                            | 20,000                   |
| Pickup Truck       | Renault, Nissan, Kia, Mitsubishi, Generic         | 20,000                   |
| Pickup Truck       | Chevrolet                                         | 35,000                   |
| Pickup Truck       | Deer                                              | 18,000                   |
| Van/SUV            | Kia                                               | 16,000                   |
| Van/SUV            | Ford                                              | 30,000                   |
| Van/SUV            | Mercedes, Hyundai, Nissan                         | 20,000                   |
| Car                | Toyota, Hyundai, Nissan, Kia, Mitsubishi, Generic | 20,000                   |



**Table A8. Assumptions on percentage of vehicle time used for immunization services and for each activity**

|                                                         | Central & South |          |     | North/KRI             |          |                  | Retaken Areas |          |     |
|---------------------------------------------------------|-----------------|----------|-----|-----------------------|----------|------------------|---------------|----------|-----|
|                                                         | Facility        | District | DOH | Facility <sup>1</sup> | District | DOH <sup>2</sup> | Facility      | District | DOH |
| <b>Average % vehicles used for routine immunization</b> | 21%             | 10%      | 47% | 8%                    | 6%       | 23%              | 12%           | 10%      | 18% |
| <b>Average % Kilometers Traveled by Activity</b>        |                 |          |     |                       |          |                  |               |          |     |
| Supervision                                             | 21%             | 40%      | 12% | 38%                   | 44%      | 10%              | 27%           | 41%      | 8%  |
| Outreach Vaccine Delivery                               | 36%             | 0%       | 0%  | 0%                    | 0%       | 0%               | 23%           | 0%       | 0%  |
| Community Mobilization Activities                       | 4%              | 0%       | 0%  | 4%                    | 0%       | 0%               | 2%            | 0%       | 0%  |
| Vaccine Collection, Distribution, & Storage             | 19%             | 19%      | 77% | 20%                   | 11%      | 81%              | 21%           | 19%      | 85% |
| Program Management                                      | 21%             | 40%      | 12% | 38%                   | 44%      | 10%              | 27%           | 41%      | 8%  |

DOH: Directorate of Health

<sup>1</sup>Facilities in the North/KRI reported no travel for outreach activities<sup>2</sup>Activity data missing, the average from the other zones used

The annualized cost of buildings was estimated using equation 3 where  $F$  is the facility size in square meters,  $P$  is the proportion of area used for routine immunization calculated from the size of the vaccine room and storage space, and  $G$  is the government price per square meter.

$$C_B = \frac{F_{m^2} \times P_{RI} \times G_{m^2}}{AF} \quad (3)$$

After consultation with the Iraq study team, the price per square meter was estimated by ranking governorates from most expensive to least expensive, and the price ranged from US\$ 600/m<sup>2</sup> in rural Ninawa (least expensive) to US\$ 1400/m<sup>2</sup> in urban Baghdad (most expensive), see Table 9. For annualization, the useful life years was assumed to be 25 years. For the cost of activities, building costs were allocated to program management at all levels.

**Table A9. Government building price per square meter in urban and rural areas<sup>1</sup>**

| Ranking | Governorate | Price per m <sup>2</sup> in Urban Areas (US\$) | Price per m <sup>2</sup> in Rural Areas (US\$) |
|---------|-------------|------------------------------------------------|------------------------------------------------|
| 1       | Baghdad     | 1400                                           | 824                                            |
| 2       | Karbulaa    | 1376                                           | 810                                            |
| 3       | Erbil       | 1353                                           | 797                                            |
| 4       | Najaf       | 1329                                           | 784                                            |
| 5       | Sulaimanieh | 1306                                           | 771                                            |
| 6       | Babel       | 1282                                           | 758                                            |
| 7       | Basrah      | 1259                                           | 745                                            |

| Ranking | Governorate | Price per m <sup>2</sup> in Urban Areas (US\$) | Price per m <sup>2</sup> in Rural Areas (US\$) |
|---------|-------------|------------------------------------------------|------------------------------------------------|
| 8       | Duhok       | 1235                                           | 731                                            |
| 9       | Diyala      | 1212                                           | 718                                            |
| 10      | Karkouk     | 1188                                           | 705                                            |
| 11      | Wasset      | 1165                                           | 692                                            |
| 12      | Dewanieh    | 1141                                           | 679                                            |
| 13      | Sallaheddin | 1118                                           | 666                                            |
| 14      | Mouthanna   | 1094                                           | 653                                            |
| 15      | Thiqar      | 1071                                           | 639                                            |
| 16      | Missan      | 1047                                           | 626                                            |
| 17      | Anbar       | 1024                                           | 613                                            |
| 18      | Ninawa      | 1000                                           | 600                                            |

<sup>1</sup>Urban assumed to be about 1.7 times expensive compared to rural

### Estimation of recurrent costs

The following approach and assumptions were used to estimate the recurrent costs of line items and immunization program activities.

#### Cold Chain Energy and Maintenance

Recurrent cold chain energy costs included the cost of electricity ( $C_E$ ) and cost of generators ( $C_G$ ) using equations 3 and 4.  $U_{kWh}$  is the total 24 hour energy usage (kWh),  $H$  is the average number of hours used per day for electricity cost and per time used for generator cost,  $F$  is the amount of liters of fuel used per hour,  $P$  is the price per kilowatt (electricity) or liters (generator), and  $T$  is the monthly frequency the generator is used.

$$C_E = U_{kWh} \times H_{day} \times P_{kW} \times 365 \quad (3)$$

$$C_G = H \times F_{L/hr} \times P_L \times T \times 12 \quad (4)$$

The daily cold chain energy usage for each type of equipment is listed in Appendix 2, Table 6. The price per kilowatt ranged from 100-150 IQD, and the price per liter of generator fuel ranged from 100-650 IQD depending on the type of fuel used. All other variables used were from the facility survey.

#### Vehicle Fuel and Maintenance

Recurrent vehicle costs included the annual cost of fuel and vehicle maintenance. The approach used to estimate vehicle fuel cost depended on the mode of transportation used for vaccine collection, outreach, supervision, training, and routine immunization meeting activities. Equation 5 was used if private or facility vehicles were used where  $D$  is the distance traveled in kilometers per trip,  $F$  is the average fuel efficiency for the vehicle type (L/km),  $P$  is the fuel price per liter, and  $T$  is the trip frequency.

$$C_V = D_{km} \times F_{L/km} \times P_L \times T \quad (5)$$

If public transportation or taxi was used, the cost was estimated using the average cost per trip multiplied by the trip frequency. Table 10 describes the vehicle fuel cost assumptions used in equation 5. Vehicle maintenance was estimated using facility reported maintenance expense multiplied by the %

used for routine immunization services, following the same approach used to estimate capital vehicle costs.

**Table A10. Vehicle fuel cost assumptions**

| Description                    | Assumptions                                                                                                                                                                                                                                                                                                                          |
|--------------------------------|--------------------------------------------------------------------------------------------------------------------------------------------------------------------------------------------------------------------------------------------------------------------------------------------------------------------------------------|
| Average fuel efficiency (L/km) | Fuel efficiency is dependent on the infrastructure and environment at each facility. The facility average for each vehicle type was used.                                                                                                                                                                                            |
| Fuel price (IQD/L)             | Fuel price per liter was standardized by region using the regional median. The median price in the Central & South region was 450 IQD/L, the North/KRI price was 500 IQD/L, and the Recovery Areas price was 600 IQD/L. At the central level, 350 IQD/L was used for refrigerated trucks, and 450 IQD/L was used for other vehicles. |
| Km traveled per trip           | Average roundtrip kilometers traveled per trip for each type of routine immunization activity (vaccine collection, outreach, supervision, routine immunization meetings, and community mobilization).                                                                                                                                |
| Trip frequency                 | Number of annual trips for each activity.                                                                                                                                                                                                                                                                                            |
| Cost per trip                  | Roundtrip cost per trip for bus or taxi from the facility survey.                                                                                                                                                                                                                                                                    |

#### *Personnel Salary and Per Diem Costs*

Personnel salaries were estimated using equation 6 where  $S_i$  is the annual salary for personnel  $i$ ,  $B_i$  is the annual benefits for personnel  $i$ , and  $P_{ij}$  is the % time spent on  $j$  routine immunization activity.

$$C_S = \sum_i \sum_j (S_i + B_i) \times P_{ij} \quad (6)$$

Personnel per diems were estimated using equation 7 where  $N_j$  is the number of personnel participating in activity  $j$ ,  $D_j$  is the number of days annually for activity  $j$ , and  $R_j$  is the daily per diem rate for activity  $j$ .

$$C_{PD} = \sum_j N_j \times D_j \times R_j \quad (7)$$

#### *Other Shared Resources*

Building utilities (excluding cold chain), office supplies, and printing were estimated using the annual expenditure in 2018 multiplied by the proportion used for routine immunization. The cost of printing and office supplies was negligible at the facility-level and the central level, but included the cost of printing immunization materials at the directorate of health (DOH) level.

Building maintenance was estimated using equation 8 where  $F$  is the facility size in square meters,  $P$  is the proportion of area used for routine immunization,  $A$  is the age of the building, and  $M$  is the cost of maintenance per square meter. The maintenance cost per square meter used was US\$ 1 per year of age for buildings  $\leq 10$  years old, US\$ 10 for buildings 11–30 years old, and US\$ 15 for buildings  $> 30$  years old.

$$C_B = F_{m^2} \times P_{RI} \times A \times M \quad (8)$$

**Appendix 3. Vaccine delivery cost at each level by line item (US\$)**

| Line Item                                      | Facility Level    | District Level   | Directorate Level | Central Level    | All Levels        |
|------------------------------------------------|-------------------|------------------|-------------------|------------------|-------------------|
| <i>Capital Costs</i>                           |                   |                  |                   |                  |                   |
| Cold Chain                                     | 455,481           | 147,332          | 83,603            | 181,654          | 868,070           |
| Vehicles                                       | 55,269            | 43,860           | 54,032            | 22,302           | 175,463           |
| Buildings                                      | 1,996,097         | 347,161          | 199,510           | 175,000          | 2,717,768         |
| Office Equipment                               | 459,149           | 98,219           | 42,458            | 4,275            | 604,100           |
| <b>Total</b>                                   | <b>2,965,995</b>  | <b>636,572</b>   | <b>379,604</b>    | <b>383,231</b>   | <b>4,365,401</b>  |
| <i>Recurrent Costs</i>                         |                   |                  |                   |                  |                   |
| Personnel Salaries <sup>1</sup>                | 80,180,113        | 6,506,620        | 1,373,699         | 311,808          | 88,372,240        |
| Personnel Per Diems                            | 158,775           | 65,815           | 11,488            | 49,124           | 285,202           |
| Training                                       | 0                 | 0                | 0                 | 1,081,133        | 1,081,133         |
| Community Mobilization Activities <sup>2</sup> | 122,477           | 0                | 0                 | 0                | 122,477           |
| Cold Chain Energy & Maintenance <sup>3</sup>   | 2,020,888         | 185,439          | 159,035           | 111,198          | 2,476,561         |
| Vehicle Maintenance & Fuel <sup>4</sup>        | 1,148,100         | 248,440          | 24,299            | 27,820           | 1,448,659         |
| Building Utilities                             | 86,895            | 183,950          | 0                 | 1,155            | 272,000           |
| Building Maintenance                           | 316,557           | 36,323           | 31,960            | 0                | 384,839           |
| Wastage Disposal                               | 369,505           | 38,442           | 7,045             | 0                | 414,991           |
| Printing & Office Supplies <sup>5</sup>        | 0                 | 26,521           | 96,405            | 0                | 122,926           |
| <b>Total</b>                                   | <b>84,403,309</b> | <b>7,291,550</b> | <b>1,703,930</b>  | <b>1,582,238</b> | <b>94,981,028</b> |
| <i>Total Costs</i>                             |                   |                  |                   |                  |                   |
| Personnel                                      | 80,338,888        | 6,572,435        | 1,385,187         | 360,932          | 88,657,442        |
| Community & Training Activities                | 122,477           | 0                | 0                 | 1,081,133        | 1,203,610         |
| Cold Chain                                     | 2,476,369         | 332,772          | 242,638           | 292,852          | 3,344,631         |
| Vehicles                                       | 1,203,369         | 292,300          | 78,331            | 50,123           | 1,624,122         |
| Buildings                                      | 2,399,548         | 567,433          | 231,470           | 176,155          | 3,374,607         |
| Wastage Disposal                               | 369,505           | 38,442           | 7,045             | 0                | 414,991           |
| Office Equipment, Supplies, & Printing         | 459,149           | 124,740          | 138,863           | 4,275            | 727,026           |
| <b>TOTAL</b>                                   | <b>87,369,304</b> | <b>7,928,121</b> | <b>2,083,534</b>  | <b>1,965,469</b> | <b>99,346,429</b> |

<sup>1</sup>Cost for personnel time spent at trainings and for cold chain maintenance are included in the Personnel Salaries.

<sup>2</sup>Community mobilization included vehicle maintenance and fuel, printing materials and personnel per diems. Annual salaries for personnel time are included in Personnel Salaries

<sup>3</sup>Cold chain maintenance estimated as 5% of the capital costs for cold chain equipment at the national level.

<sup>4</sup>Excluding vehicle maintenance and fuel for community mobilization activities and trainings

<sup>5</sup>Assumed \$0 for printing at facility, district, and national levels. Cost of printing immunization materials included at the Directorate store level.
